# Supplementary material for: The Angiotensin II Receptor Blocker Losartan Sensitizes Human Liver Cancer Cells to Lenvatinib-Mediated Cytostatic and Angiostatic Effects
Source: PubMed Central journal article supplement (PMC8001516; doi:10.3390/cells10030575), 2021-03-05
Supplement: cells-10-00575-s001.pdf [file cells-10-00575-s001.pdf]

## Supplementary Materials

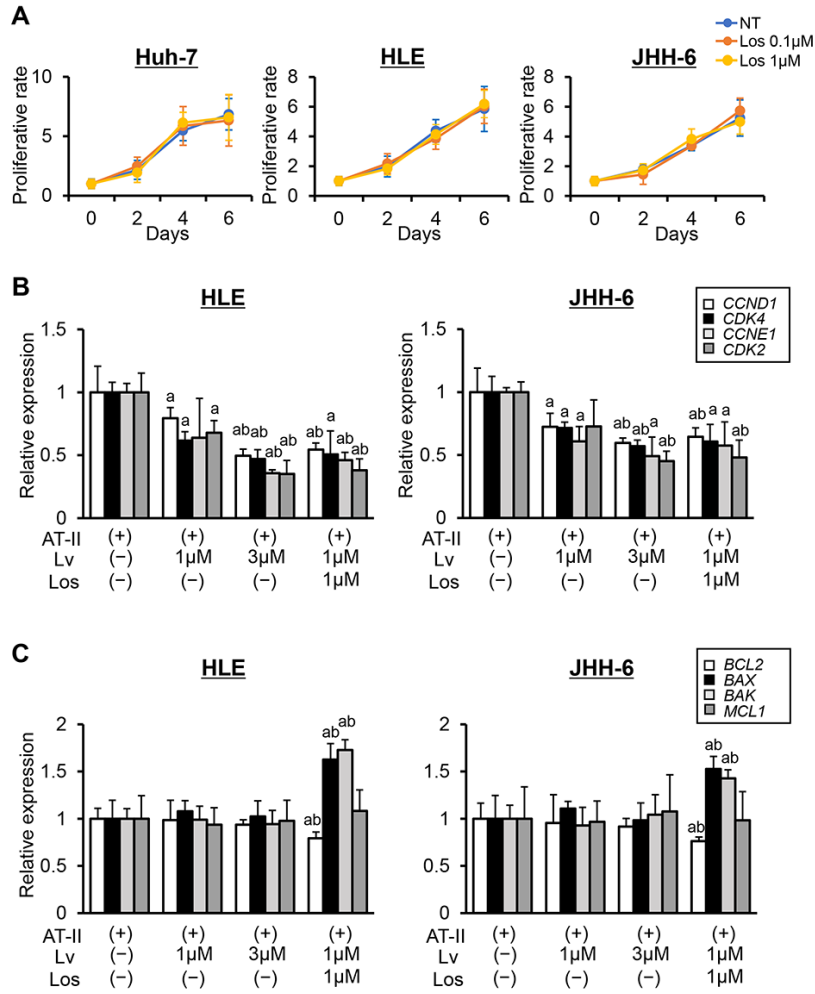

**Figure S1.** *In vitro* cytostatic effects of lenvatinib and losartan on different HCC cell lines. (A) Cell proliferation of human liver cancer cells (Huh-7, HLE and JHH-6) incubated with losartan (Los) (0, 0.1 and 1 μM) under the condition without stimulation of angiotensin-II (AT-II) for 0-6 days. (B and C) Relative mRNA expression levels of cell cycle-related markers (B) and apoptosis-related markers (C) in HLE and JHH-6. Cells were pre-treated with AT-II (1 μM) for 12 h and subsequently treated with Los (1 μM) and/or lenvatinib (Lv) (1 or 3 μM) for 12 h. The mRNA expression levels were measured by qRT-PCR, and *GAPDH* was used as internal control. Quantitative values are relatively indicated as fold changes to the values of (A) group at the start of treatment with losartan in each dose, (B and C) group of AT-II(+)/Lv(-)/Los(-). Data are mean ± SD (*n* = 3 independent experiments with *n* = 8 samples per condition). <sup>a</sup>*p* < 0.05, <sup>b</sup>*p* < 0.05 compared with group treated with AT-II(+)/Lv(-)/Los(-) and AT-II(+)/Lv(1 μM)/Los(-), respectively (B and C).

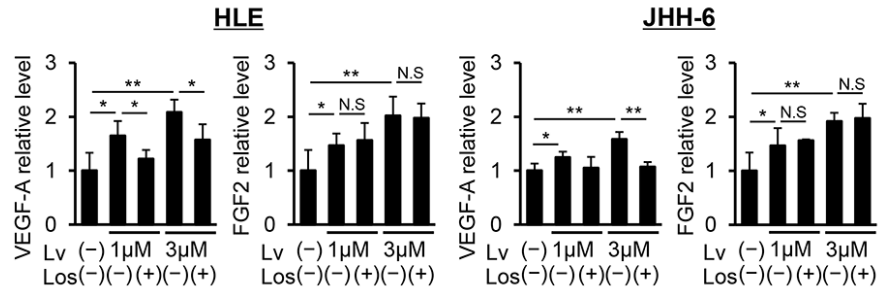

**Figure S2.** *In vitro* VEGF-A and FGF2 levels in different HCC cell lines treated with lenvatinib and losartan. VEGF-A and FGF2 levels in HLE or JHH-6-cultured media. Cells were treated with Los (1 µM) and/or lenvatinib (Lv) (1 or 3 µM) for 24 h. Quantitative values are relatively indicated as fold changes to the values of group of Los(-)/Lv(-). Quantitative values are relatively indicated as fold changes to the values of group of Los(-)/Lv(-). Data are mean ± SD ( $n = 3$  independent experiments with  $n = 8$  samples per condition). \*  $p < 0.05$ ; \*\*  $p < 0.01$  indicating a significant difference between groups N.S: Not significant.

**Table S1.** List of primers used in q-PCR.

| gene          | Sense (5'-3')        | Antisense (5'-3')    |
|---------------|----------------------|----------------------|
| <b>Mouse</b>  |                      |                      |
| <i>CD34</i>   | GGGTAGCTCTCTGCCTGATG | TCTCTGAGATGGCTGGTGTG |
| <b>Human</b>  |                      |                      |
| <i>CCND1</i>  | CCCTCGGTGTCCTACTTCAA | CTTAGAGGCCACGAACATGC |
| <i>CDK4</i>   | CCCACACAAGCGAATCTCTG | ACCCTCCATAGCCTCAGAGA |
| <i>CCNE1</i>  | CGCTGATGAAGATGCACACA | ACAGAAGAGAACGTGGAGCA |
| <i>CDK2</i>   | AGGCATGAGGAATCTGGGAG | GAGGTGGACGTCAGAGGAAA |
| <i>BCL2</i>   | CCACGTGGTAAGATCCTCCA | AGAGGCTGGGCACATTTACT |
| <i>BAX</i>    | AACATGGAGCTGCAGAGGAT | CCAATGTCCAGCCCATGATG |
| <i>BAK</i>    | CCAGGACACAGAGGAGGTTT | CTCTGAGTCATAGCGTCCGT |
| <i>MCL1</i>   | AGTAGGAGCTGGTTTGGCAT | TGCTTTTCTGGCTAGGTTGC |
| <i>VEGF-A</i> | GGGCAGAATCATCACGAAGT | TGGTGATGTTGGACTCCTCA |
| <i>FGF2</i>   | CATGGCTGCAGTTCCTTTGT | TCCTGCCACACAAATTTGCA |
| <i>CXCL8</i>  | CAGTTTTGCCAAGGAGTGCT | ACTTCTCCACAACCCTCTGC |
